# Supplementary material for: Room temperature DMMP gas sensing based on cobalt phthalocyanine derivative/graphene quantum dot hybrid materials
Source: Royal Society of Chemistry journal article supplement (doi:10.1039/d1ra01975a), 2021-01-01
Supplement: d1ra01975a1.pdf [file d1ra01975a1.pdf]

## Supporting Information

# Room temperature DMMP gas sensing based on cobalt phthalocyanine derivative/graphene quantum dot hybrid materials

Wenkai Jiang<sup>a</sup>, Menglin Jiang<sup>b</sup>, Tao Wang<sup>a</sup>, Xinwei Chen<sup>a</sup>, Min Zeng<sup>a</sup>, Jianhua Yang<sup>a</sup>,  
Zhihua Zhou<sup>a</sup>, Nantao Hu<sup>a</sup>, Yanjie Su<sup>a</sup>, and Zhi Yang<sup>a\*</sup>

*<sup>a</sup>Key Laboratory of Thin Film and Microfabrication (Ministry of Education),  
Department of Micro/Nano Electronics, School of Electronic Information and  
Electrical Engineering, Shanghai Jiao Tong University, Shanghai 200240, P. R. China.*

*<sup>b</sup>Chinesisch-Deutsche Fakultät, Taizhou Vocational and Technical College, Taizhou  
318000, P. R. China.*

\*Corresponding author. E-mail address: zhiyang@sjtu.edu.cn (Z. Yang).

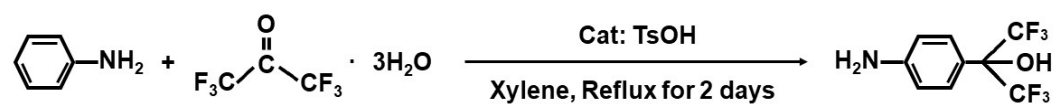

**Figure S1.** The synthesis route for P-aminophenyl hexafluoroisopropanol (HFIPA).

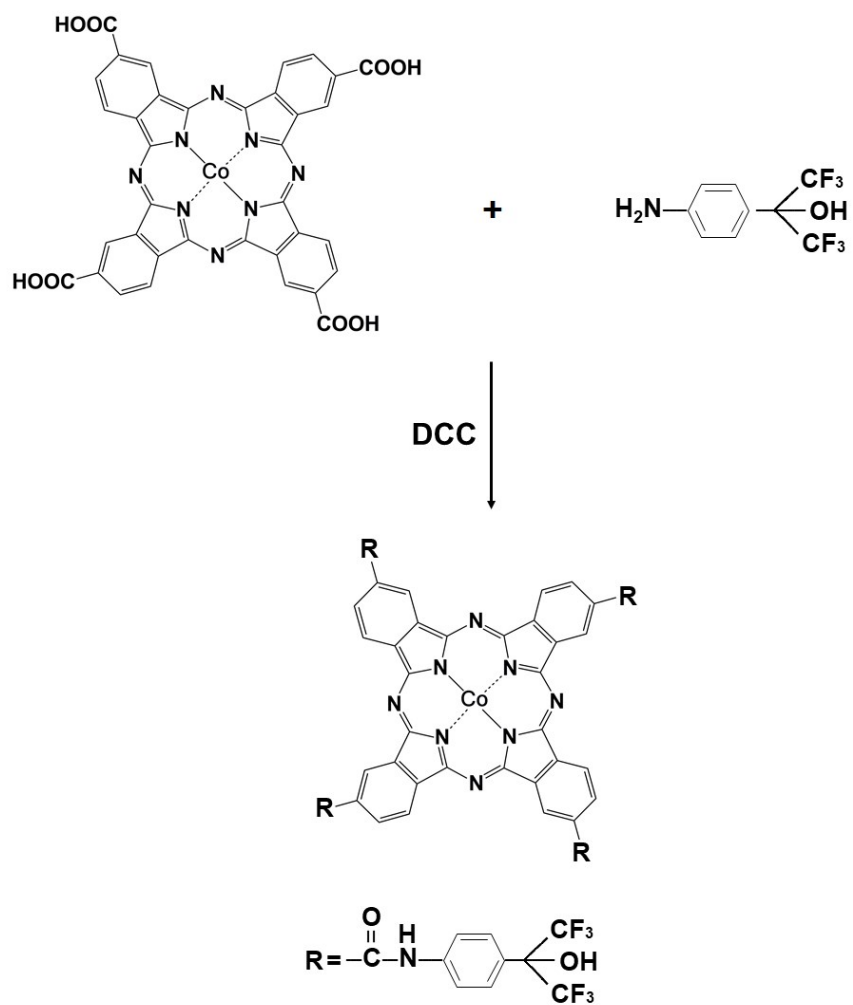

**Figure S2.** The outline of the synthesis of CoPc-HFIP.

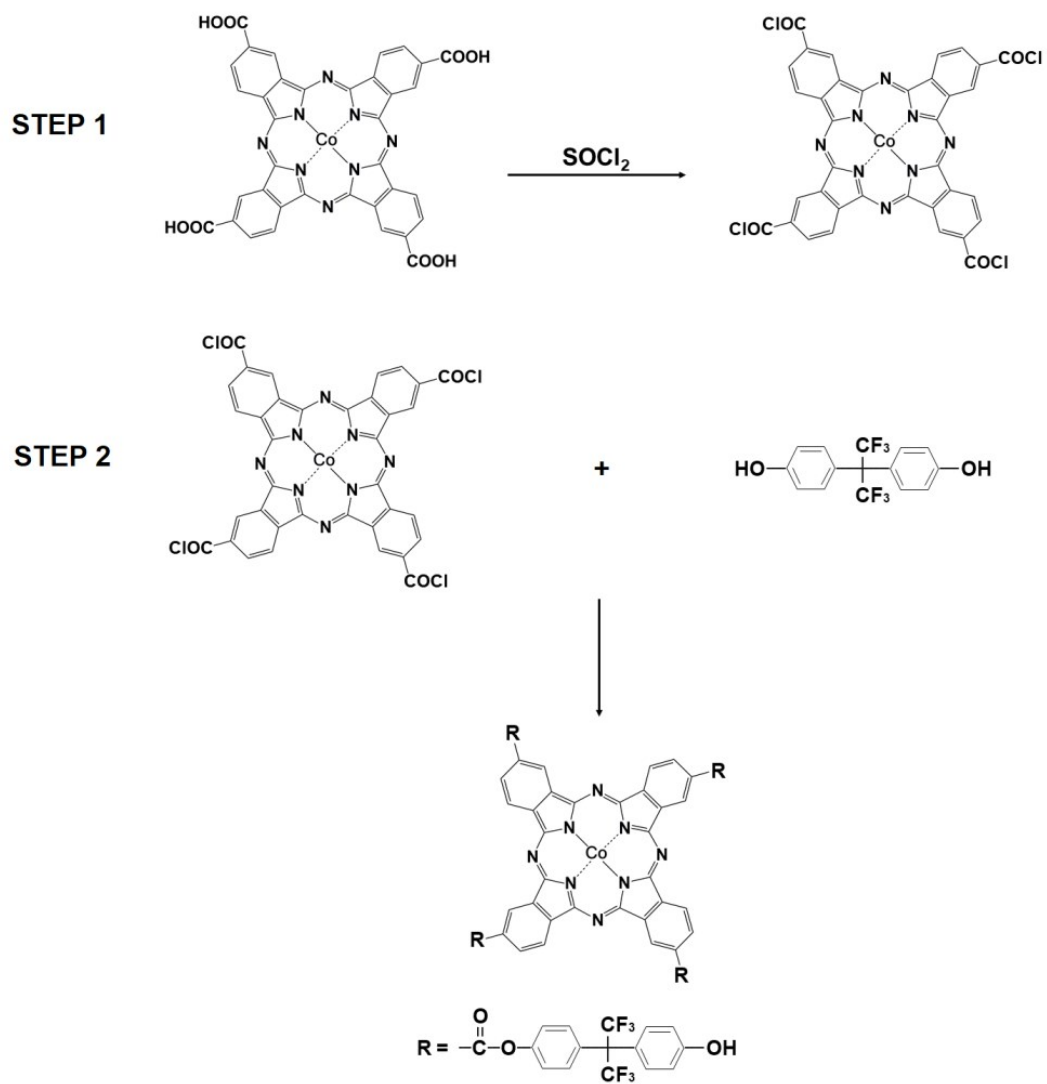

**Figure S3.** The outline of the synthesis of CoPc-6FBPA.

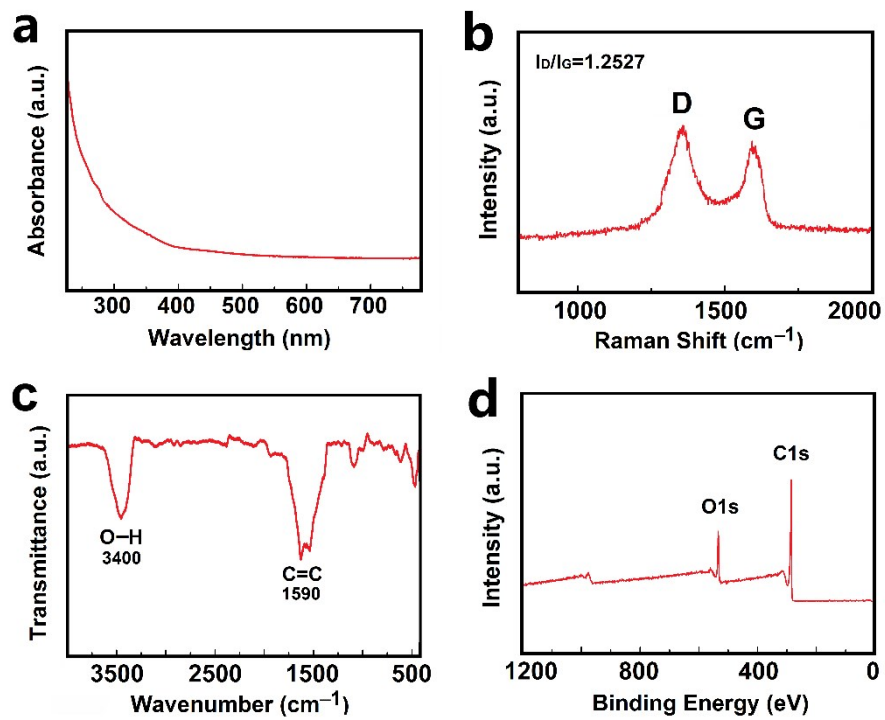

**Figure S4.** (a) The UV-Vis absorption spectrum, (b) Raman spectrum, (c) FT-IR spectrum (d) XPS

survey scan spectrum of GQDs.

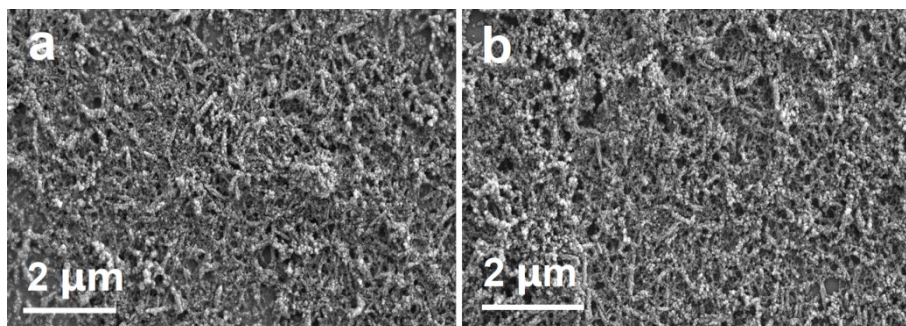

**Figure S5.** SEM images of (a) CoPc-HFIP and (b) CoPc-6FBPA.

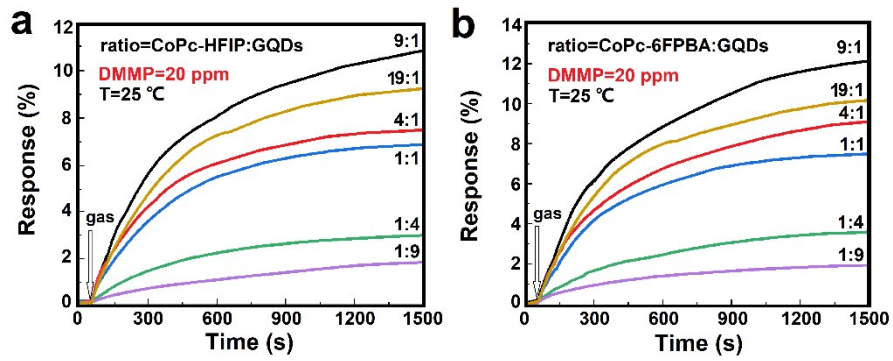

**Figure S6.** The comparison of response curves of hybrid materials of (a) CoPc–HFIP or (b) CoPc–6FPBA mixed with GQDs in different proportions to 20 ppm DMMP gas at room temperature.

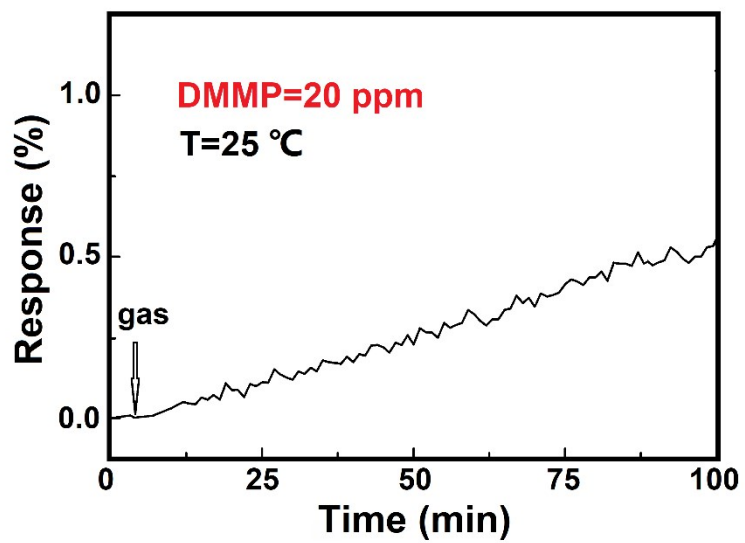

**Figure S7.** The response curve of GQDs towards 20 ppm DMMP gas at room temperature.



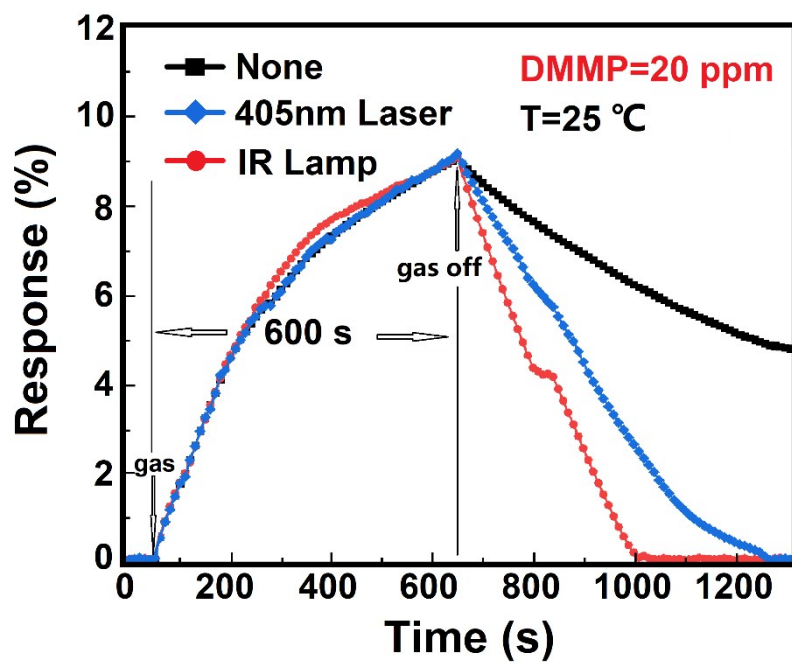

**Figure S8.** The response and recovery curves of CoPc-6FBPA-GQD to 20 ppm DMMP gas at room temperature with different recovery methods.

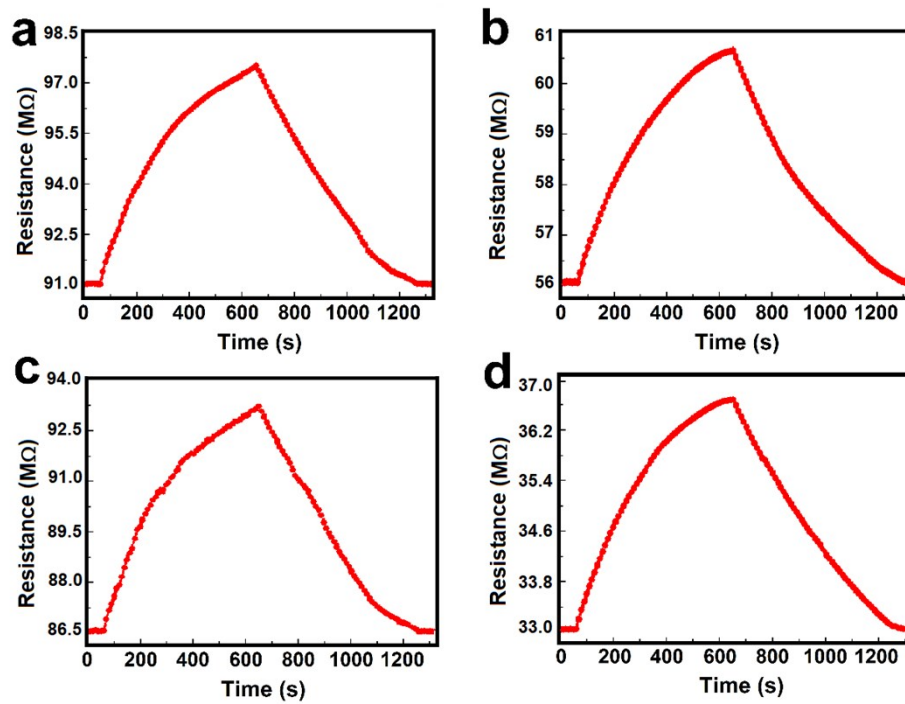

Figure S9. The resistance curves of (a) CoPc-HFIP, (b) CoPc-HFIP-GQD, (c) CoPc-6FBPA and (d) CoPc-6FBPA-GQD to 20 ppm DMMP gas at room temperature with laser-assisted recovery.
